# Supplementary material for: Analysis of the Wnt gene repertoire in an onychophoran provides new insights into the evolution of segmentation
Source: EvoDevo. 2014 Apr 3;5:14. doi: 10.1186/2041-9139-5-14 (PMC4021614; doi:10.1186/2041-9139-5-14)
Supplement: Additional file 1: Figure S1 — Schematic summary of early multiple-segment-wide expression domains of Wnt genes compared with the expression of Hox genes. This figure has been modified after [26]. Expression of Wnt genes is indicated by black, dark grey and light grey bars. Low level expression is indicated by thin bars and ‘w’. 1–15, first to fifteenth leg-bearing segments; abd-A, abdominal-A, Abd-B, Abdominal-B; Antp, Antennapedia; Dfd, Deformed; fap, frontal appendage; ftz, fushi-tarazu; hl, head lobe; j, jaw; lab, labial; pb, proboscipedia; SAZ, segment addition zone; Scr, Sex combs reduced; sp, slime papilla; Ubx, Ultrabithorax. [file 2041-9139-5-14-S1.pdf]

|              | hl+fap | j | sp | 1 | 2 | 3 | 4 | 5 | 6 | 7 | 8 | 9 | 10 | 11 | 12 | 13 | 14 | 15 | SAZ |  |
|--------------|--------|---|----|---|---|---|---|---|---|---|---|---|----|----|----|----|----|----|-----|--|
| <i>lab</i>   |        |   |    |   |   |   |   |   |   |   |   |   |    |    |    |    |    |    |     |  |
| <i>pb</i>    |        |   |    |   |   |   |   |   |   |   |   |   |    |    |    |    |    |    |     |  |
| <i>Hox3</i>  |        |   |    |   |   |   |   |   |   |   |   |   |    |    |    |    |    |    |     |  |
| <i>Dfd</i>   |        |   |    |   |   |   |   |   |   |   |   |   |    |    |    |    |    |    |     |  |
| <i>Scr</i>   |        |   |    |   |   |   |   |   |   |   |   |   |    |    |    |    |    |    |     |  |
| <i>ftz</i>   |        |   |    |   |   |   |   |   |   |   |   |   |    |    |    |    |    |    |     |  |
| <i>Antp</i>  |        |   |    |   |   |   | W |   |   |   |   |   |    |    |    |    |    |    |     |  |
| <i>Ubx</i>   |        |   |    |   |   |   |   |   |   |   |   |   |    |    |    |    |    |    |     |  |
| <i>abd-A</i> |        |   |    |   |   |   |   |   |   |   |   |   |    |    |    |    |    |    |     |  |
| <i>Abd-B</i> |        |   |    |   |   |   |   |   |   |   |   |   |    |    |    |    |    |    |     |  |
| <i>Wnt2</i>  |        |   |    |   |   |   |   |   |   |   |   |   |    |    |    |    |    |    |     |  |
| <i>Wnt4</i>  |        |   |    | W |   |   |   |   |   |   |   |   |    |    |    |    |    |    |     |  |
| <i>Wnt5</i>  |        |   |    |   |   |   |   |   |   |   |   |   |    |    |    |    |    |    |     |  |
